# Supplementary material
Source: Springer Nature journal article supplement (https://www.springermedizin.de/resource/supplementary/12885_2009_2389_MOESM9_ESM.pdf/9461178)

**A: PBS**

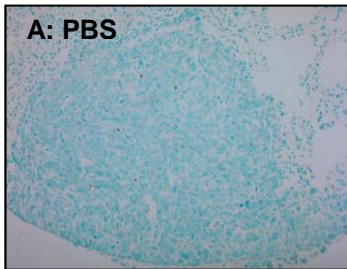

**B: Rat USMSC**

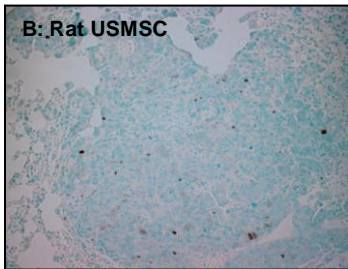

**C**

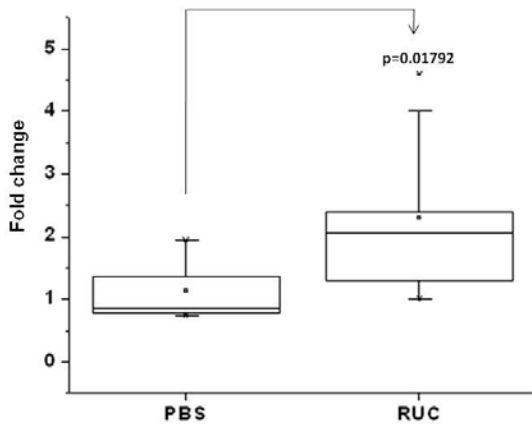

Supplement: MOESM9 [file 9461178]
